# Supplementary material for: Stable sandwich structures of two-dimensional iron borides FeBxalloy: a first-principles calculation
Source: Royal Society of Chemistry journal article supplement (doi:10.1039/c7ra03153j), 2017-01-01
Supplement: c7ra03153j1.pdf [file c7ra03153j1.pdf]

## Stable sandwich structures of two-dimensional iron borides $\text{FeB}_x$

### alloy: A first-principles calculation

#### Supplementary Material

Shao-Gang Xu<sup>ab</sup>, Yu-Jun Zhao<sup>a</sup>, Xiao-Bao Yang<sup>\*a</sup>, and Hu Xu<sup>\*b</sup>

<sup>a</sup> Department of Physics, South China University of Technology, Guangzhou 510640, P. R. China

<sup>b</sup> Department of Physics, South University of Science and Technology of China, Shenzhen 518055, P. R. China

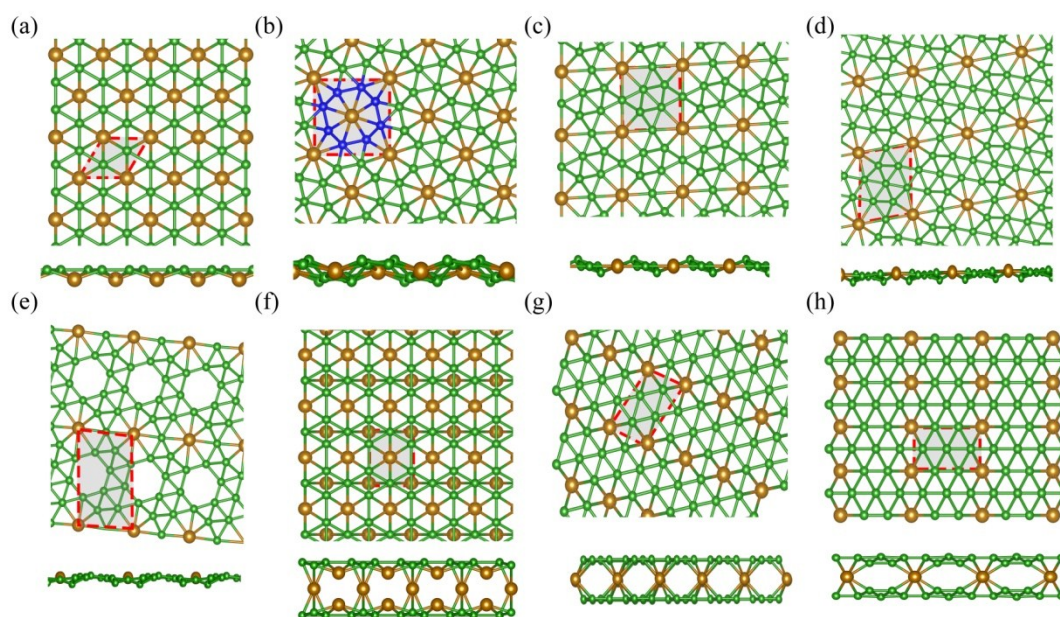

Fig.S1. The structure of the iron borides  $\text{FeB}_x$  alloy (Top view and Side view). (a-e) The monolayer  $\text{FeB}_x$  ( $x=2, 4, 6, 8, 10$ ). (f-h) The sandwich structure  $\text{FeB}_2$  and (Borophene  $\text{FeB}_8$ ,  $\text{FeB}_{10}$ ).

In order to measure the relative structural stability of all the structure with various coverage, we have calculated the formation enthalpy  $\Delta H(x)$  as

$$\Delta H(x) = (E_{tot} - y \times \mu_{Fe} - x \times \mu_B) / (y + x)$$

The formation enthalpy phase diagram shown in the below.

\*E-mail address: scxbyang@scut.edu.cn

\*E-mail address: xu.h@sustc.edu.cn

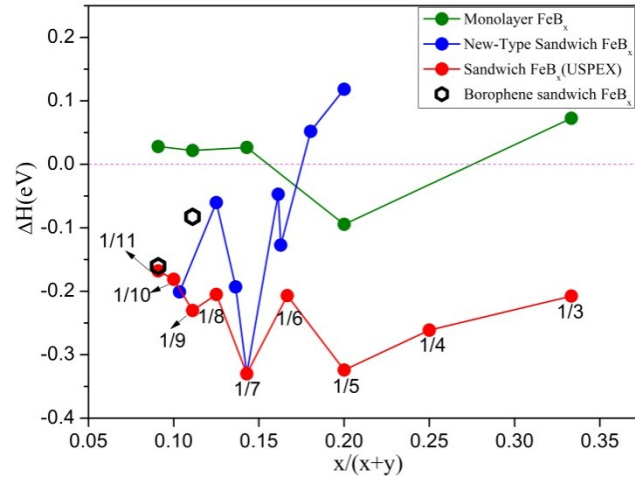

Fig.S2. The formation enthalpy phase diagram with various coverage of iron borides  $\text{FeB}_x$ . The green dots represent the stable planar structure  $\text{FeB}_x$  ( $x=2-10$ ) search by USPEX. The red dots represent the stable sandwich  $\text{FeB}_x$  searched by USPEX. The blue dots represent the stable sandwich structures based on triangular lattice supercells. The two hollow hexagons represent the sandwich structure based on the borophene.

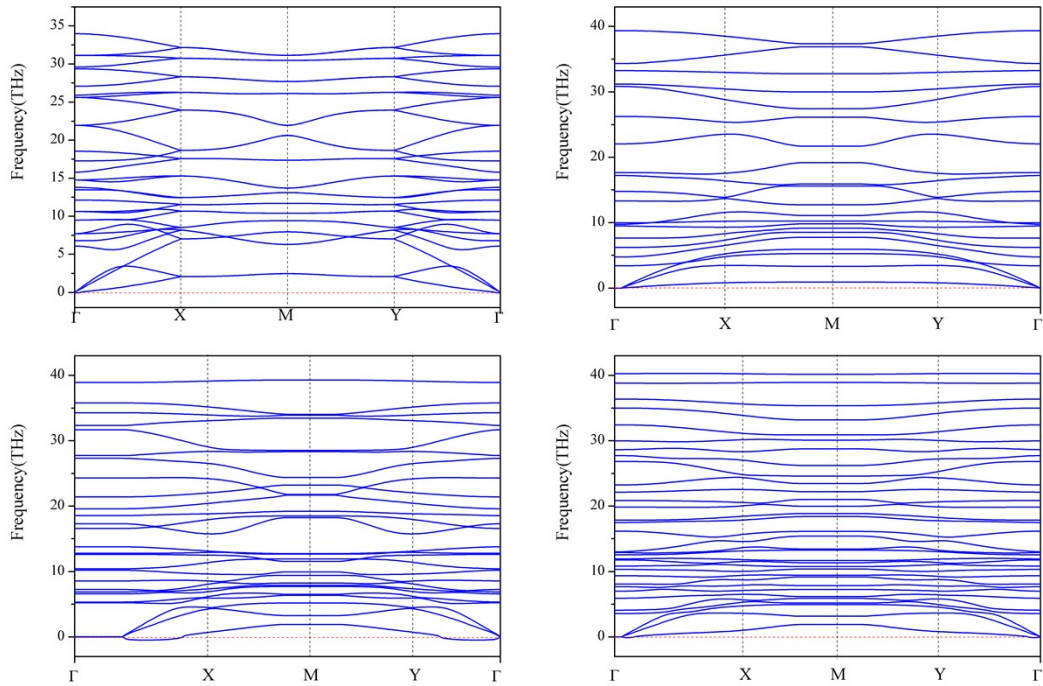

Fig.S3. Phonon band dispersions of  $\text{FeB}_4$ ,  $\text{FeB}_6$ ,  $\text{FeB}_8$  and  $\text{FeB}_{10}$  monolayer

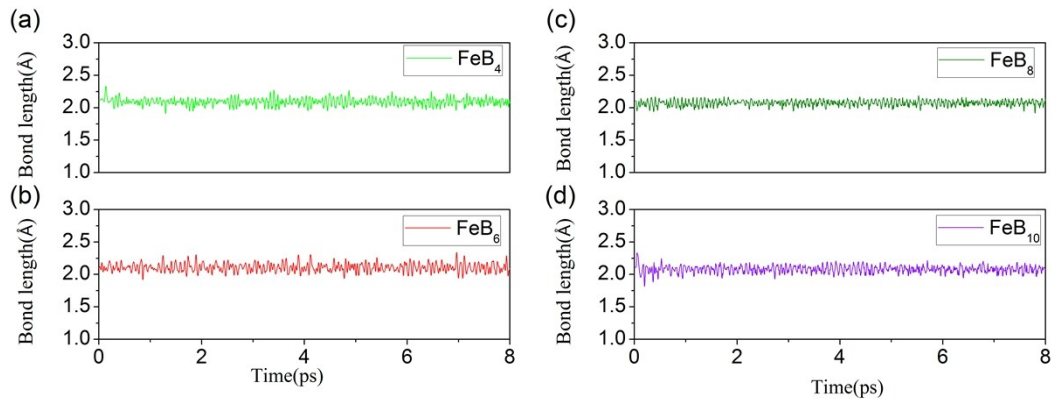

Fig.S4. The Fe-B bond length fluctuation during AIMD simulations at 370K for the iron borides  $\text{FeB}_x(x=4,6,8,10)$  sandwiches(GGA-PBE).

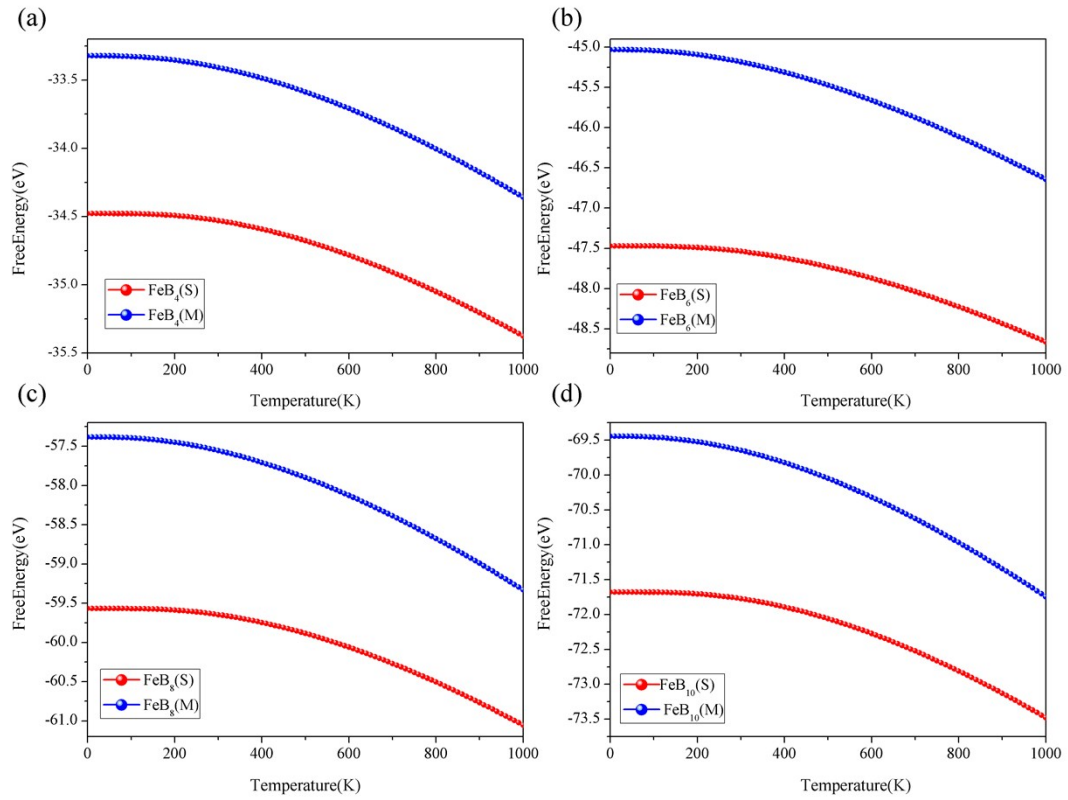

Fig.S5. The free energies as a function of temperature for the corresponding iron borides  $\text{FeB}_x(x=4,6,8,10)$  alloys. The red dots represent the sandwich(S) structures, the blue dots represent the monolayer(M) structures, (a-d) shown the results of  $\text{FeB}_4$ ,  $\text{FeB}_6$ ,  $\text{FeB}_8$  and  $\text{FeB}_{10}$ , respectively.

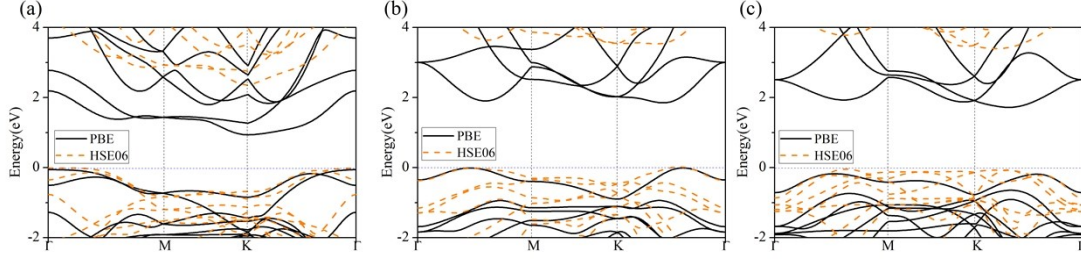

Fig.S6. (a,b,c) PBE and HSE06 band structures for FeB<sub>4</sub>,FeB<sub>8</sub> and FeB<sub>10</sub> sandwiches.

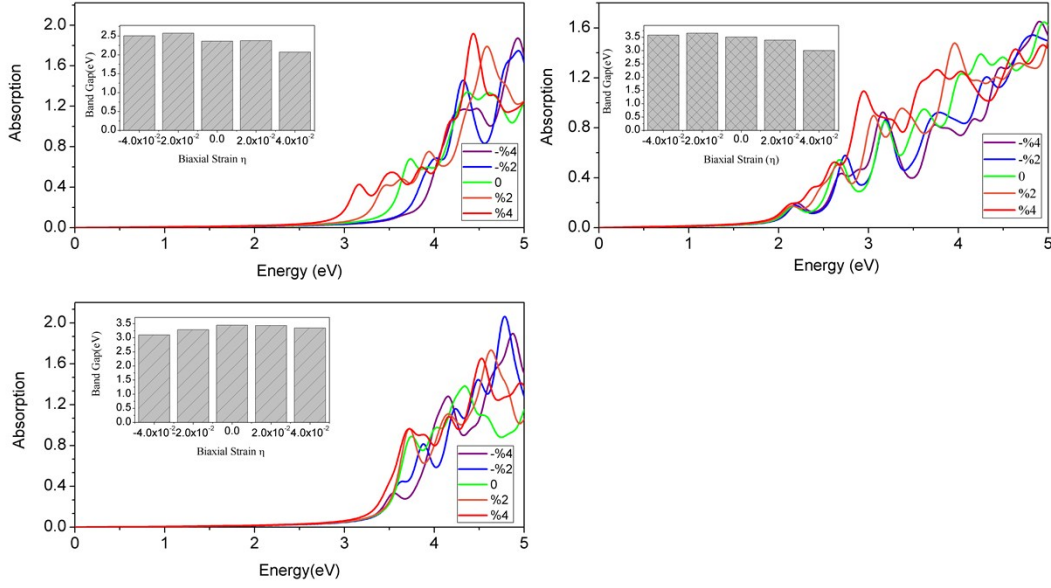

Fig.S7. The relation of optical properties and change of biaxial strain. (a-c) represent the results of FeB<sub>4</sub>, FeB<sub>8</sub> and FeB<sub>10</sub> sandwiches based on the HSE06 functional.

The Raman active modes of the FeB<sub>6</sub> can be represented by the Raman tensors in the group theory analysis,

for point group symmetry  $D_{6h}$ , the Raman active modes are characterized by the following tensors (R):

$$A_{1g}: \begin{pmatrix} a & 0 & 0 \\ 0 & a & 0 \\ 0 & 0 & b \end{pmatrix} \quad E_{1g}: \begin{pmatrix} 0 & 0 & 0 \\ 0 & 0 & c \\ 0 & c & 0 \end{pmatrix} \begin{pmatrix} 0 & 0 & c \\ 0 & 0 & 0 \\ c & 0 & 0 \end{pmatrix} \quad E_{2g}: \begin{pmatrix} d & 0 & 0 \\ 0 & d & 0 \\ 0 & 0 & 0 \end{pmatrix} \begin{pmatrix} 0 & d & 0 \\ d & 0 & 0 \\ 0 & 0 & 0 \end{pmatrix}$$

The Raman scattering intensity is proportional to  $|e_i \cdot R \cdot e_j|^2$ , where  $e_i$  and  $e_s$  are the polarization vector of the incident light and scattering light, respectively, and  $R$  is the Raman tensor. If the materials are oriented in the  $xy$  plane, the incoming and scattered lights are oriented along the  $z$  axis. Here the vector  $e_i$  and  $e_s$  can be written as  $(\cos\theta, \sin\theta, 0)$  and  $(\cos\alpha, \sin\alpha, 0)$  respectively. While, in the backscattering configuration the modes  $A_{1g}$  and  $E_{1g}$  do not contribute to the Raman spectra.

Here, the intensity of mode  $E_{2g}(a)$  is calculated as  $I_{E_{2g}(a)} \approx d^2 |\cos(\theta - \alpha)|^2$ , and mode  $E_{2g}(b)$  is calculated as  $I_{E_{2g}(b)} \approx d^2 |\sin(\theta + \alpha)|^2$ . As the in-plane rotation of the crystal by  $\varphi$  is equivalent to the rotation of both

incoming and scattered light by  $-\varphi$  with sample fixed. We applied the simplified situation with the parallel

polarization ( $\theta=\alpha$ ), and then rotate the sample by  $\varphi$ , then  $I_{E_{2g}(a)} \approx d^2$ ,  $I_{E_{2g}(b)} \approx d^2 \sin^2(2\varphi)$ .

For  $E_{2g}(a)$  mode, the material would be isotropic, with a constant radial dependence. The  $E_{2g}(b)$  with angular dependence for the intensity, which reaches a minimum when  $\varphi = 0^\circ, 90^\circ, 180^\circ$ , and  $270^\circ$ , otherwise,  $\varphi = 45^\circ, 135^\circ, 225^\circ$  and  $315^\circ$  meet the maximum, which is shown in Fig.S8.

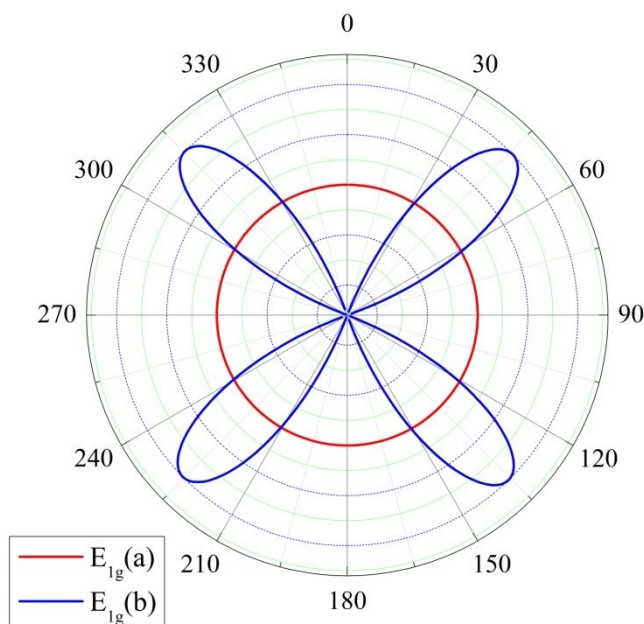

Fig.S8. Angular dependence of Raman intensity for  $\text{FeB}_6$  with  $D_{6h}$  symmetry. The polarization dependence for  $E_{1g}(a),(b)$ .

Direct coordinates for the stable iron borides  $\text{FeB}_x(x=4,6,8,10)$  sandwiches. (POSCAR)

#####

**FeB<sub>4</sub>**

B Fe

```

1.0000000000000000
  1.7773000000000001 -3.0783000000000000  0.0000000000000000
  1.7773000000000001  3.0783000000000000  0.0000000000000000
  0.0000000000000000  0.0000000000000000  18.0281610000073513

```

B Fe

8 2

Direct

```

0.6524543516174219  0.9796620202595889  0.5000019245420333
0.1524544523619511  0.4796619195150598  0.5000020754579708

```

|                    |                    |                    |
|--------------------|--------------------|--------------------|
| 0.1524309043532739 | 0.4796776747562532 | 0.3843698326241096 |
| 0.6524313479881911 | 0.9796791344540310 | 0.6156267908845621 |
| 0.6524447219481218 | 0.4796671660658305 | 0.6161818717156038 |
| 0.1524444478427540 | 0.9796658919604582 | 0.3838171282843987 |
| 0.6524442793638627 | 0.9796866057100573 | 0.3843721037653722 |
| 0.1524437390616455 | 0.4796870493449674 | 0.6156292727259611 |
| 0.6524027996541406 | 0.4796996908896247 | 0.4479376594237223 |
| 0.1524029558086397 | 0.9796998470441238 | 0.5520623405762777 |

#####

**FeB<sub>6</sub>**

B Fe

|                     |                    |                     |
|---------------------|--------------------|---------------------|
| 1.0000000000000000  |                    |                     |
| 3.4748999999999999  | 0.0000000000000000 | 0.0000000000000000  |
| -1.7374499999999999 | 3.0093519999999998 | 0.0000000000000000  |
| 0.0000000000000000  | 0.0000000000000000 | 15.1183004379000003 |

|   |    |
|---|----|
| B | Fe |
| 6 | 1  |

Direct

|                    |                    |                    |
|--------------------|--------------------|--------------------|
| 0.0000000000000000 | 0.5000000000000000 | 0.4221512269607146 |
| 0.0000000000000000 | 0.5000000000000000 | 0.5778488030392879 |
| 0.5000000000000000 | 0.5000000000000000 | 0.4221512269607146 |
| 0.5000000000000000 | 0.5000000000000000 | 0.5778488030392879 |
| 0.5000000000000000 | 0.0000000000000000 | 0.4221512269607146 |
| 0.5000000000000000 | 0.0000000000000000 | 0.5778488030392879 |
| 0.0000000000000000 | 0.0000000000000000 | 0.5000000000000000 |

#####

**FeB<sub>8</sub>**

POSCAR B Fe

|                    |                     |                     |
|--------------------|---------------------|---------------------|
| 1.0000020000000000 |                     |                     |
| 1.7295339605100899 | -2.9955528196034802 | 0.0000000000000000  |
| 1.7295339605100899 | 2.9955528196034802  | 0.0000000000000000  |
| 0.0000000000000000 | 0.0000000000000000  | 17.9915770006009694 |

|   |    |
|---|----|
| B | Fe |
| 8 | 1  |

Direct

|                    |                    |                    |
|--------------------|--------------------|--------------------|
| 0.5303370235417333 | 0.0109324390426195 | 0.5328991254036808 |
| 0.0303412995273078 | 0.5109335605626129 | 0.5328995111860095 |
| 0.5303455775325858 | 0.5109360137850771 | 0.5329009851771715 |
| 0.6969572911344315 | 0.3442318601859995 | 0.6180212733945254 |
| 0.0303249205141753 | 0.5110188954788271 | 0.3997071340647054 |
| 0.5303291456159087 | 0.5110228895649769 | 0.3997068427882127 |
| 0.5303265566221995 | 0.0110285005609114 | 0.3997086747461154 |

0.3636379204224767 0.6775902258135176 0.6180220819886770  
0.0303442650891981 0.0109996150054457 0.4661373712508876

#####

### FeB<sub>10</sub>

POSCAR B Fe

1.00000200000000

1.7295339605100899 -2.9955528196034802 0.0000000000000000

1.7295339605100899 2.9955528196034802 0.0000000000000000

0.0000000000000000 0.0000000000000000 17.9915770006009694

B Fe

10 1

Direct

0.5303845845688997 0.0110683574548389 0.5333523099667090

0.0303827297054085 0.5110642025026806 0.5333500018896160

0.5303815820558881 0.5110650643083261 0.5333518147173706

0.6970479116897721 0.3443479512786354 0.6184741507909308

0.0302674947380481 0.5108835762893449 0.3992222733144430

0.5302747412859503 0.5108850457444447 0.3992207599283617

0.5302671331367321 0.0108753088481777 0.3992344400428181

0.3636920425430503 0.6776674579012862 0.6184787854246068

0.6968698656190568 0.3440659418876209 0.3141026518478327

0.3636235818599047 0.6775919975243809 0.3140941611744594

0.0303475443542141 0.0110011822597613 0.4662898509028395

#####

### Reference

1. H. Zhang, Y. Li, J. Hou, A. Du and Z. Chen, *Nano Lett.*, 2016, 16, 6124-6129.
2. H. J. Zhang, Y. F. Li, J. H. Hou, K. X. Tu and Z. F. Chen, *J. Am. Chem. Soc.*, 2016, 138, 5644-5651.
